# Supplementary material
Source: PubMed Central journal article supplement (PMC4587665)
Supplement: NIHMS648563-supplement-1.pdf [file NIHMS648563-supplement-1.pdf]

# **Synergistic Activity of PARP Inhibition by Talazoparib (BMN 673) with Temozolomide in Pediatric Cancer Models in the Pediatric Preclinical Testing Program**

Smith, M.A. et al

Supplemental Table I: Topotecan in vitro activity in the presence and absence of talazoparib (10 nM)

Supplemental Table II. Efficacy of PPTP Single agents and combinations in Xenograft Models

Supplemental Table III. Efficacy of Combination B against PPTP Xenograft Models

Supplemental Table IV: Therapeutic Enhancement in vivo.

Supplemental Table V. Responses to Tumor Models to Combination B (talazoparib plus low-dose temozolomide)

Supplemental Figure 1. Kaplan-Meier estimates for Event-Free Survival in Ewing sarcoma xenograft models.

Supplemental Figure 2. Quantification of total (cleaved + uncleaved) PARP, and cleaved PARP following 5 days treatment of TC-71R tumors with talazoparib, temozolomide or the combination. Relative levels of total and cleaved PARP are shown for parental TC-71 xenografts.

**Supplemental Table I: Topotecan in vitro activity in the presence and absence of talazoparib (10 nM)**

| Cell Line      | Histotype        | Topotecan rIC <sub>50</sub> (nM) | Topotecan + Talazoparib rIC <sub>50</sub> (nM) | Potential  | Topotecan Relative I/O% (Observed Ymin) <sup>3</sup> | Topotecan + Talazoparib Relative I/O% (Observed Ymin) <sup>3</sup> |
|----------------|------------------|----------------------------------|------------------------------------------------|------------|------------------------------------------------------|--------------------------------------------------------------------|
| RD             | Rhabdomyosarcoma | 1.7                              | 7.2                                            | 4.3        | 37%                                                  | 38%                                                                |
| Rh41           | Rhabdomyosarcoma | 20.4                             | 12.9                                           | 0.6        | -22%                                                 | -31%                                                               |
| Rh18           | Rhabdomyosarcoma | 3.9                              | 10.8                                           | 2.8        | -11%                                                 | -34%                                                               |
| Rh30           | Rhabdomyosarcoma | 4.1                              | 11.3                                           | 2.7        | -23%                                                 | -50%                                                               |
| BT-12          | Rhabdoid         | 7.1                              | 20.1                                           | 2.8        | 14%                                                  | 12%                                                                |
| CHLA-266       | Rhabdoid         | 8.9                              | 20.6                                           | 2.3        | 2%                                                   | -7%                                                                |
| TC-71          | Ewing sarcoma    | NE                               | 4.3                                            | NA         | -98%                                                 | -99%                                                               |
| CHLA-9         | Ewing sarcoma    | 1.2                              | 2.1                                            | 1.8        | -94%                                                 | -94%                                                               |
| CHLA-10        | Ewing sarcoma    | 3.2                              | 10.8                                           | 3.3        | -82%                                                 | -85%                                                               |
| CHLA-258       | Ewing sarcoma    | 4.9                              | 10.7                                           | 2.2        | -75%                                                 | -80%                                                               |
| GBM2           | Glioblastoma     | 2.9                              | 9.0                                            | 3.1        | -61%                                                 | -66%                                                               |
| NB-1643        | Neuroblastoma    | 2.6                              | 6.7                                            | 2.6        | -87%                                                 | -88%                                                               |
| NB-EBc1        | Neuroblastoma    | 5.6                              | 12.5                                           | 2.2        | -91%                                                 | -93%                                                               |
| CHLA-90        | Neuroblastoma    | 5.5                              | NE                                             | NA         | 29%                                                  | 32%                                                                |
| CHLA-136       | Neuroblastoma    | 4.2                              | 14.1                                           | 3.4        | -46%                                                 | -50%                                                               |
| NALM-6         | ALL              | 3.5                              | 11.6                                           | 3.3        | -99%                                                 | -99%                                                               |
| COG-LL-317     | ALL              | 0.8                              | 3.3                                            | 4.0        | -98%                                                 | -99%                                                               |
| RS4;11         | ALL              | 4.3                              | 12.5                                           | 2.9        | -96%                                                 | -97%                                                               |
| MOLT-4         | ALL              | 1.3                              | 5.2                                            | 3.9        | -100%                                                | -100%                                                              |
| CCRF-CEM (1)   | ALL              | 4.0                              | 9.6                                            | 2.4        | -97%                                                 | -97%                                                               |
| Kasumi-1       | AML              | 6.4                              | 13.5                                           | 2.1        | -63%                                                 | -77%                                                               |
| Karpas-299     | ALCL             | 8.0                              | 21.2                                           | 2.7        | 0%                                                   | -51%                                                               |
| Ramos-RA1      | NHL              | 2.1                              | 8.3                                            | 4.1        | -89%                                                 | -87%                                                               |
| <b>Median</b>  |                  | <b>4.1</b>                       | <b>10.8</b>                                    | <b>2.8</b> | <b>-75%</b>                                          | <b>-80%</b>                                                        |
| <b>Minimum</b> |                  | <b>0.8</b>                       | <b>2.1</b>                                     | <b>0.6</b> | <b>-100%</b>                                         | <b>-100%</b>                                                       |
| <b>Maximum</b> |                  | <b>20.4</b>                      | <b>21.2</b>                                    | <b>4.3</b> | <b>37%</b>                                           | <b>38%</b>                                                         |

<sup>1</sup> Ratio of topotecan rIC<sub>50</sub> in absence and presence talazoparib (10 nM)

<sup>2</sup> Ymin (observed) for topotecan in the presence of 10 nM talazoparib. See Materials and Methods for definition.

<sup>3</sup> Relative In/Out% (observed Ymin) for topotecan or topotecan or topotecan in the presence of 10 nM talazoparib. See Materials and Methods for definition.

NE = not evaluable. NA = not applicable.

**Supplemental Table II. Efficacy of PPTP Single agents and combinations in Xenograft Models**

| Study Information |                  | Animal Counts/Status |                 |                 |                 |                 |                     | EFS Evaluation       |                  |         | Tumor Volume Evaluation |                       |           |                       |        | Response Evaluation |     |    |    |    |     |              | Overall Group Response |     |
|-------------------|------------------|----------------------|-----------------|-----------------|-----------------|-----------------|---------------------|----------------------|------------------|---------|-------------------------|-----------------------|-----------|-----------------------|--------|---------------------|-----|----|----|----|-----|--------------|------------------------|-----|
| Cell Line         | Line Description | Group <sup>1</sup>   | N1 <sup>2</sup> | Nd <sup>3</sup> | No <sup>4</sup> | Na <sup>5</sup> | No. ev <sup>6</sup> | KM med. <sup>7</sup> | Log-Rank P-value | EFS T/C | Med. RTV <sup>8</sup>   | Avg. RTV <sup>9</sup> | T/C (Day) | Wilc. P <sup>10</sup> | PD     | PD1                 | PD2 | SD | PR | CR | MCR | Median Score |                        |     |
| A2                | KT-10            | A <sup>1</sup>       | 10              | 0               | 0               | 10              | 10                  | 17.6                 |                  |         | >4                      | 2.74                  | .         | .                     | 10     | 0                   | 0   | 0  | 0  | 0  | 0   | 0            | 0.0                    | PD  |
|                   |                  | B <sup>2</sup>       | 10              | 0               | 0               | 10              | 10                  | 21.8                 | 0.084            | 1.2     | >4                      | 1.74                  | 0.64      | 14                    | 0.043  | 0                   | 4   | 1  | 0  | 2  | 3   | 0            | 4.0                    | SD  |
|                   |                  | C <sup>2</sup>       | 10              | 0               | 0               | 10              | 5                   | .                    | <0.001           | >5.2    | >4                      | 0.02                  | 0.01      | 14                    | <0.001 | 0                   | 0   | 0  | 0  | 0  | 8   | 2            | 8.0                    | CR  |
|                   |                  | D <sup>2</sup>       | 10              | 0               | 0               | 10              | 0                   | .                    | <0.001           | >5.2    | 0.0                     | 0.02                  | 0.01      | 14                    | <0.001 | 0                   | 0   | 0  | 0  | 0  | 0   | 10           | 10.0                   | MCR |
|                   |                  | E <sup>2</sup>       | 10              | 0               | 0               | 10              | 0                   | .                    | <0.001           | >5.2    | 0.0                     | 0.00                  | 0.00      | 14                    | <0.001 | 0                   | 0   | 0  | 0  | 0  | 0   | 10           | 10.0                   | MCR |
|                   |                  | D v E                |                 |                 |                 |                 |                     |                      | 1.000            |         |                         |                       |           |                       |        |                     |     |    |    |    |     |              |                        |     |
| A6                | SK-NEP-1         | A                    | 9               | 0               | 0               | 9               | 9                   | 10.5                 |                  |         | >4                      | 2.92                  | .         | .                     | 9      | 0                   | 0   | 0  | 0  | 0  | 0   | 0            | 0.0                    | PD  |
|                   |                  | B                    | 9               | 0               | 0               | 9               | 9                   | 8.9                  | 0.389            | 0.8     | >4                      | 3.09                  | 1.06      | 7                     | 0.666  | 0                   | 9   | 0  | 0  | 0  | 0   | 0            | 0.0                    | PD1 |
|                   |                  | C                    | 9               | 0               | 0               | 9               | 9                   | 10.1                 | 0.916            | 1.0     | >4                      | 2.78                  | 0.95      | 7                     | 0.666  | 0                   | 8   | 1  | 0  | 0  | 0   | 0            | 0.0                    | PD1 |
|                   |                  | D                    | 9               | 0               | 0               | 9               | 8                   | 32.3                 | <0.001           | 3.1     | >4                      | 0.28                  | 0.09      | 7                     | <0.001 | 0                   | 0   | 0  | 0  | 5  | 4   | 0            | 6.0                    | PR  |
|                   |                  | E                    | 10              | 0               | 0               | 10              | 0                   | .                    | <0.001           | >8.6    | 0.0                     | 0.23                  | 0.08      | 7                     | <0.001 | 0                   | 0   | 0  | 0  | 0  | 0   | 10           | 10.0                   | MCR |
|                   |                  | D v E                |                 |                 |                 |                 |                     |                      | <0.001           |         |                         |                       |           |                       |        |                     |     |    |    |    |     |              |                        |     |
| B2                | EW5              | A                    | 9               | 0               | 0               | 9               | 9                   | 8.8                  |                  |         | >4                      | 3.17                  | .         | .                     | 9      | 0                   | 0   | 0  | 0  | 0  | 0   | 0            | 0.0                    | PD  |
|                   |                  | B                    | 10              | 0               | 0               | 10              | 10                  | 9.9                  | 0.507            | 1.1     | >4                      | 2.41                  | 0.76      | 7                     | 0.035  | 0                   | 10  | 0  | 0  | 0  | 0   | 0            | 0.0                    | PD1 |
|                   |                  | C                    | 10              | 0               | 0               | 10              | 10                  | 8.9                  | 0.941            | 1.0     | >4                      | 3.05                  | 0.96      | 7                     | 0.720  | 0                   | 10  | 0  | 0  | 0  | 0   | 0            | 0.0                    | PD1 |
|                   |                  | D                    | 10              | 0               | 0               | 10              | 10                  | 28.6                 | <0.001           | 3.3     | >4                      | 0.61                  | 0.19      | 7                     | <0.001 | 0                   | 0   | 3  | 0  | 3  | 4   | 0            | 6.0                    | PR  |
|                   |                  | E                    | 10              | 0               | 0               | 10              | 10                  | 24.0                 | <0.001           | 2.7     | >4                      | 0.60                  | 0.19      | 7                     | <0.001 | 0                   | 0   | 4  | 0  | 0  | 6   | 0            | 8.0                    | CR  |
|                   |                  | D v E                |                 |                 |                 |                 |                     |                      | 0.055            |         |                         |                       |           |                       |        |                     |     |    |    |    |     |              |                        |     |
| B3                | EW8              | A                    | 10              | 0               | 0               | 10              | 10                  | 6.8                  |                  |         | >4                      | 4.13                  | .         | .                     | 10     | 0                   | 0   | 0  | 0  | 0  | 0   | 0            | 0.0                    | PD  |
|                   |                  | B                    | 10              | 0               | 0               | 10              | 10                  | 9.1                  | 0.005            | 1.3     | >4                      | 2.94                  | 0.71      | 7                     | <0.001 | 0                   | 9   | 1  | 0  | 0  | 0   | 0            | 0.0                    | PD1 |
|                   |                  | C                    | 10              | 0               | 0               | 10              | 10                  | 13.4                 | <0.001           | 2.0     | >4                      | 1.61                  | 0.39      | 7                     | <0.001 | 0                   | 1   | 9  | 0  | 0  | 0   | 0            | 2.0                    | PD2 |
|                   |                  | D                    | 10              | 0               | 0               | 10              | 10                  | 15.7                 | <0.001           | 2.3     | >4                      | 1.83                  | 0.44      | 7                     | <0.001 | 0                   | 1   | 9  | 0  | 0  | 0   | 0            | 2.0                    | PD2 |
|                   |                  | E                    | 10              | 0               | 0               | 10              | 10                  | 12.6                 | <0.001           | 1.9     | >4                      | 2.28                  | 0.55      | 7                     | <0.001 | 0                   | 3   | 7  | 0  | 0  | 0   | 0            | 2.0                    | PD2 |
|                   |                  | D v E                |                 |                 |                 |                 |                     |                      | 0.361            |         |                         |                       |           |                       |        |                     |     |    |    |    |     |              |                        |     |
| B11               | TC-71            | A                    | 9               | 0               | 0               | 9               | 9                   | 10.4                 |                  |         | >4                      | 6.07                  | .         | .                     | 9      | 0                   | 0   | 0  | 0  | 0  | 0   | 0            | 0.0                    | PD  |
|                   |                  | B                    | 10              | 0               | 0               | 10              | 10                  | 10.7                 | 0.368            | 1.0     | >4                      | 6.98                  | 1.15      | 14                    | 0.315  | 0                   | 10  | 0  | 0  | 0  | 0   | 0            | 0.0                    | PD1 |
|                   |                  | C                    | 10              | 0               | 0               | 10              | 10                  | 12.2                 | 0.016            | 1.2     | >4                      | 4.95                  | 0.82      | 14                    | 0.113  | 0                   | 9   | 1  | 0  | 0  | 0   | 0            | 0.0                    | PD1 |
|                   |                  | D                    | 10              | 0               | 0               | 10              | 3                   | .                    | <0.001           | >8.8    | 0.0                     | 0.04                  | 0.01      | 14                    | <0.001 | 0                   | 0   | 0  | 0  | 0  | 3   | 7            | 10.0                   | MCR |
|                   |                  | E                    | 10              | 0               | 0               | 10              | 4                   | .                    | <0.001           | >8.8    | 0.0                     | 0.06                  | 0.01      | 14                    | <0.001 | 0                   | 0   | 0  | 0  | 0  | 4   | 6            | 10.0                   | MCR |
|                   |                  | D v E                |                 |                 |                 |                 |                     |                      | 0.833            |         |                         |                       |           |                       |        |                     |     |    |    |    |     |              |                        |     |
| B12               | CHLA258          | A                    | 10              | 0               | 0               | 10              | 10                  | 9.5                  |                  |         | >4                      | 8.66                  | .         | .                     | 10     | 0                   | 0   | 0  | 0  | 0  | 0   | 0            | 0.0                    | PD  |
|                   |                  | B                    | 10              | 0               | 0               | 10              | 10                  | 10.2                 | 0.242            | 1.1     | >4                      | 7.20                  | 0.83      | 7                     | 0.211  | 0                   | 9   | 1  | 0  | 0  | 0   | 0            | 0.0                    | PD1 |

| Study Information |                  | Animal Counts/Status |                 |                 |                 |                 | EFS Evaluation      |                      |                  | Tumor Volume Evaluation |                       |                       |           |                       | Response Evaluation |     |     |    |    |    |     | Overall Group Response |      |     |     |     |
|-------------------|------------------|----------------------|-----------------|-----------------|-----------------|-----------------|---------------------|----------------------|------------------|-------------------------|-----------------------|-----------------------|-----------|-----------------------|---------------------|-----|-----|----|----|----|-----|------------------------|------|-----|-----|-----|
| Cell Line         | Line Description | Group <sup>1</sup>   | N1 <sup>2</sup> | Nd <sup>3</sup> | No <sup>4</sup> | Na <sup>5</sup> | No. ev <sup>6</sup> | KM med. <sup>7</sup> | Log-Rank P-value | EFS T/C                 | Med. RTV <sup>8</sup> | Avg. RTV <sup>9</sup> | T/C (Day) | Wilc. P <sup>10</sup> | PD                  | PD1 | PD2 | SD | PR | CR | MCR | Median Score           |      |     |     |     |
|                   |                  |                      |                 |                 |                 |                 |                     |                      |                  |                         |                       |                       |           |                       |                     |     |     |    |    |    |     |                        |      |     |     |     |
| B15               | ES6              | C                    | 10              | 0               | 0               | 10              | 10                  | 11.8                 | 0.034            | 1.2                     | >4                    | 5.88                  | 0.68      | 14                    | 0.029               | 0   | 8   | 2  | 0  | 0  | 0   | 0                      | 0.0  | PD1 |     |     |
|                   |                  | D                    | 10              | 0               | 0               | 10              | 0                   | .                    | <0.001           | >9.6                    | 0.0                   | 0.07                  | 0.01      | 14                    | <0.001              | 0   | 0   | 0  | 0  | 0  | 0   | 10                     | 10.0 | MCR |     |     |
|                   |                  | E                    | 10              | 0               | 0               | 10              | 5                   | .                    | <0.001           | >9.6                    | >4                    | 0.05                  | 0.01      | 14                    | <0.001              | 0   | 0   | 0  | 0  | 0  | 8   | 2                      | 8.0  | CR  |     |     |
|                   |                  | D v E                |                 | <b>0.033</b>    |                 |                 |                     |                      |                  |                         |                       |                       |           |                       |                     |     |     |    |    |    |     |                        |      |     |     |     |
|                   |                  | A                    | 10              | 0               | 0               | 10              | 10                  | 19.1                 |                  |                         |                       | >4                    | 2.93      | .                     | .                   |     | 10  | 0  | 0  | 0  | 0   | 0                      | 0    | 0.0 | PD  |     |
|                   |                  | B                    | 10              | 0               | 0               | 10              | 10                  | 25.1                 | 0.039            | 1.3                     | >4                    | 2.22                  | 0.76      | 14                    | 0.105               | 0   | 7   | 3  | 0  | 0  | 0   | 0                      | 0    | 0.0 | PD1 |     |
|                   |                  | C                    | 10              | 0               | 0               | 10              | 10                  | 20.6                 | 0.845            | 1.1                     | >4                    | 2.68                  | 0.92      | 14                    | 0.393               | 0   | 10  | 0  | 0  | 0  | 0   | 0                      | 0    | 0.0 | PD1 |     |
| B6                | Rh28             | D                    | 10              | 0               | 0               | 10              | 10                  | 35.9                 | <0.001           | 1.9                     | >4                    | 0.93                  | 0.32      | 14                    | <0.001              | 0   | 1   | 6  | 0  | 1  | 2   | 0                      | 2.0  | PD2 |     |     |
|                   |                  | E                    | 10              | 0               | 0               | 10              | 10                  | 31.6                 | <0.001           | 1.7                     | >4                    | 1.37                  | 0.47      | 14                    | <0.001              | 0   | 3   | 7  | 0  | 0  | 0   | 0                      | 2.0  | PD2 |     |     |
|                   |                  | D v E                |                 | 0.162           |                 |                 |                     |                      |                  |                         |                       |                       |           |                       |                     |     |     |    |    |    |     |                        |      |     |     |     |
|                   |                  | A                    | 9               | 0               | 0               | 9               | 9                   | 30.0                 |                  |                         |                       | >4                    | 2.46      | .                     | .                   |     | 9   | 0  | 0  | 0  | 0   | 0                      | 0    | 0.0 | PD  |     |
|                   |                  | B                    | 10              | 0               | 0               | 10              | 3                   | .                    | <0.001           | >3.0                    | 0.0                   | 1.17                  | 0.48      | 14                    | <0.001              | 0   | 0   | 0  | 0  | 0  | 3   | 7                      | 10.0 | MCR |     |     |
|                   |                  | C                    | 10              | 0               | 0               | 10              | 10                  | 13.7                 | 0.003            | 0.5                     | >4                    | 3.83                  | 1.56      | 7                     | 0.017               | 0   | 10  | 0  | 0  | 0  | 0   | 0                      | 0    | 0.0 | PD1 |     |
|                   |                  | D                    | 10              | 0               | 0               | 10              | 1                   | .                    | <0.001           | >3.0                    | 0.0                   | 0.56                  | 0.23      | 14                    | <0.001              | 0   | 0   | 0  | 0  | 0  | 1   | 9                      | 10.0 | MCR |     |     |
| B7                | Rh30             | E                    | 10              | 0               | 0               | 10              | 0                   | .                    | <0.001           | >3.0                    | 0.0                   | 0.03                  | 0.01      | 14                    | <0.001              | 0   | 0   | 0  | 0  | 0  | 0   | 10                     | 10.0 | MCR |     |     |
|                   |                  | D v E                |                 | 1.000           |                 |                 |                     |                      |                  |                         |                       |                       |           |                       |                     |     |     |    |    |    |     |                        |      |     |     |     |
|                   |                  | A                    | 10              | 0               | 0               | 10              | 10                  | 15.4                 |                  |                         |                       | >4                    | 3.93      | .                     | .                   |     | 10  | 0  | 0  | 0  | 0   | 0                      | 0    | 0.0 | PD  |     |
|                   |                  | B                    | 10              | 0               | 0               | 10              | 10                  | 16.8                 | 0.799            | 1.1                     | >4                    | 3.60                  | 0.91      | 14                    | 0.739               | 0   | 10  | 0  | 0  | 0  | 0   | 0                      | 0    | 0.0 | PD1 |     |
|                   |                  | C                    | 10              | 0               | 0               | 10              | 10                  | 15.0                 | 0.624            | 1.0                     | >4                    | 3.74                  | 0.95      | 14                    | 0.796               | 0   | 8   | 2  | 0  | 0  | 0   | 0                      | 0    | 0.0 | PD1 |     |
|                   |                  | D                    | 10              | 0               | 0               | 10              | 10                  | 50.0                 | <0.001           | 3.2                     | >4                    | 0.34                  | 0.09      | 14                    | <0.001              | 0   | 0   | 0  | 0  | 4  | 6   | 0                      | 8.0  | CR  |     |     |
|                   |                  | E                    | 10              | 0               | 0               | 10              | 10                  | 37.3                 | <0.001           | 2.4                     | >4                    | 0.58                  | 0.15      | 14                    | <0.001              | 0   | 0   | 5  | 0  | 3  | 2   | 0                      | 4.0  | SD  |     |     |
| B8                | Rh41             | D v E                |                 | <0.001          |                 |                 |                     |                      |                  |                         |                       |                       |           |                       |                     |     |     |    |    |    |     |                        |      |     |     |     |
|                   |                  | A                    | 10              | 0               | 0               | 10              | 10                  | 12.8                 |                  |                         |                       | >4                    | 4.75      | .                     | .                   |     | 10  | 0  | 0  | 0  | 0   | 0                      | 0    | 0.0 | PD  |     |
|                   |                  | B                    | 10              | 0               | 0               | 10              | 10                  | 11.8                 | 0.176            | 0.9                     | >4                    | 5.18                  | 1.09      | 14                    | 0.247               | 0   | 10  | 0  | 0  | 0  | 0   | 0                      | 0    | 0.0 | PD1 |     |
|                   |                  | C                    | 10              | 0               | 0               | 10              | 10                  | 11.1                 | 0.090            | 0.9                     | >4                    | 5.41                  | 1.14      | 14                    | 0.143               | 0   | 10  | 0  | 0  | 0  | 0   | 0                      | 0    | 0.0 | PD1 |     |
|                   |                  | D                    | 10              | 0               | 0               | 10              | 10                  | 11.3                 | 0.072            | 0.9                     | >4                    | 5.11                  | 1.08      | 14                    | 0.247               | 0   | 10  | 0  | 0  | 0  | 0   | 0                      | 0    | 0.0 | PD1 |     |
|                   |                  | E                    | 10              | 0               | 0               | 10              | 10                  | 13.9                 | 0.061            | 1.1                     | >4                    | 3.35                  | 0.70      | 14                    | 0.089               | 0   | 7   | 3  | 0  | 0  | 0   | 0                      | 0    | 0.0 | PD1 |     |
|                   |                  | D v E                |                 | <b>0.009</b>    |                 |                 |                     |                      |                  |                         |                       |                       |           |                       |                     |     |     |    |    |    |     |                        |      |     |     |     |
| B16               | ES-4             | A                    | 10              | 0               | 0               | 10              | 10                  | 11.4                 |                  |                         |                       | >4                    | 5.56      | .                     | .                   |     | 10  | 0  | 0  | 0  | 0   | 0                      | 0    | 0.0 | PD  |     |
|                   |                  | B                    | 10              | 0               | 0               | 10              | 10                  | 15.8                 | 0.001            | 1.4                     | >4                    | 3.73                  | 0.67      | 14                    | 0.005               | 0   | 8   | 2  | 0  | 0  | 0   | 0                      | 0.0  | PD1 |     |     |
|                   |                  | C                    | 10              | 0               | 0               | 10              | 10                  | 14.3                 | 0.032            | 1.3                     | >4                    | 4.67                  | 0.84      | 14                    | 0.089               | 0   | 9   | 1  | 0  | 0  | 0   | 0                      | 0.0  | PD1 |     |     |
|                   |                  | D                    | 10              | 0               | 0               | 10              | 8                   | 81.5                 | <0.001           | 7.1                     | >4                    | 0.01                  | 0.00      | 14                    | <0.001              | 0   | 0   | 0  | 0  | 0  | 9   | 1                      | 8.0  | CR  |     |     |
|                   |                  | E                    | 10              | 0               | 0               | 10              | 7                   | 77.4                 | <0.001           | 6.8                     | >4                    | 0.00                  | 0.00      | 14                    | <0.001              | 0   | 0   | 0  | 0  | 0  | 9   | 1                      | 8.0  | CR  |     |     |
|                   |                  | D v E                |                 | 0.814           |                 |                 |                     |                      |                  |                         |                       |                       |           |                       |                     |     |     |    |    |    |     |                        |      |     |     |     |
|                   |                  | B29                  | ES-2            | A               | 9               | 0               | 0                   | 9                    | 9                | 11.8                    |                       |                       |           | >4                    | 5.25                | .   | .   |    | 9  | 0  | 0   | 0                      | 0    | 0   | 0   | 0.0 |
| B                 | 9                |                      |                 | 0               | 0               | 9               | 9                   | 12.7                 | 0.567            | 1.1                     | >4                    | 5.75                  | 1.10      | 14                    | 0.730               | 0   | 9   | 0  | 0  | 0  | 0   | 0                      | 0    | 0.0 | PD1 |     |

| Study Information |                  | Animal Counts/Status |                 |                 |                 |                 | EFS Evaluation      |                      |                  | Tumor Volume Evaluation |                       |                       |      |                | Response Evaluation   |    |     |     |    |    |    | Overall Group Response |              |     |  |
|-------------------|------------------|----------------------|-----------------|-----------------|-----------------|-----------------|---------------------|----------------------|------------------|-------------------------|-----------------------|-----------------------|------|----------------|-----------------------|----|-----|-----|----|----|----|------------------------|--------------|-----|--|
| Cell Line         | Line Description | Group <sup>1</sup>   | N1 <sup>2</sup> | Nd <sup>3</sup> | No <sup>4</sup> | Na <sup>5</sup> | No. ev <sup>6</sup> | KM med. <sup>7</sup> | Log-Rank P-value | EFS T/C                 | Med. RTV <sup>8</sup> | Avg. RTV <sup>9</sup> | T/C  | T/C Time (Day) | Wilc. P <sup>10</sup> | PD | PD1 | PD2 | SD | PR | CR | MCR                    | Median Score |     |  |
|                   |                  |                      |                 |                 |                 |                 |                     |                      |                  |                         |                       |                       |      |                |                       |    |     |     |    |    |    |                        |              |     |  |
| B30               | ES-3             | C                    | 9               | 0               | 0               | 9               | 9                   | 14.0                 | 0.712            | 1.2                     | >4                    | 4.44                  | 0.85 | 14             | 0.297                 | 0  | 9   | 0   | 0  | 0  | 0  | 0                      | 0.0          | PD1 |  |
|                   |                  | D                    | 10              | 0               | 0               | 10              | 10                  | 19.2                 | 0.002            | 1.6                     | >4                    | 2.20                  | 0.42 | 14             | 0.002                 | 0  | 3   | 7   | 0  | 0  | 0  | 0                      | 2.0          | PD2 |  |
|                   |                  | E                    | 10              | 0               | 0               | 10              | 10                  | 30.3                 | <0.001           | 2.6                     | >4                    | 0.84                  | 0.16 | 14             | <0.001                | 0  | 0   | 4   | 0  | 0  | 6  | 0                      | 8.0          | CR  |  |
|                   |                  | D v E                |                 | 0.019           |                 |                 |                     |                      |                  |                         |                       |                       |      |                |                       |    |     |     |    |    |    |                        |              |     |  |
|                   |                  | A                    | 9               | 0               | 0               | 9               | 9                   | 8.9                  |                  |                         | >4                    | 8.93                  | .    | .              |                       | 9  | 0   | 0   | 0  | 0  | 0  | 0                      | 0.0          | PD  |  |
|                   |                  | B                    | 10              | 0               | 0               | 10              | 10                  | 10.3                 | 0.007            | 1.2                     | >4                    | 6.69                  | 0.75 | 14             | 0.013                 | 0  | 9   | 1   | 0  | 0  | 0  | 0                      | 0.0          | PD1 |  |
|                   |                  | C                    | 10              | 0               | 0               | 10              | 10                  | 10.7                 | 0.011            | 1.2                     | >4                    | 6.57                  | 0.74 | 14             | 0.013                 | 0  | 10  | 0   | 0  | 0  | 0  | 0                      | 0.0          | PD1 |  |
|                   |                  | D                    | 10              | 0               | 0               | 10              | 10                  | 26.0                 | <0.001           | 2.9                     | >4                    | 0.95                  | 0.11 | 14             | <0.001                | 0  | 0   | 0   | 0  | 2  | 8  | 0                      | 8.0          | CR  |  |
|                   |                  | E                    | 10              | 0               | 0               | 10              | 10                  | 18.3                 | <0.001           | 2.1                     | >4                    | 2.51                  | 0.28 | 14             | <0.001                | 0  | 0   | 2   | 0  | 2  | 6  | 0                      | 8.0          | CR  |  |
|                   |                  | D v E                |                 | 0.001           |                 |                 |                     |                      |                  |                         |                       |                       |      |                |                       |    |     |     |    |    |    |                        |              |     |  |
| B31               | ES-7             | A                    | 9               | 0               | 0               | 9               | 9                   | 11.6                 |                  |                         | >4                    | 5.37                  | .    | .              |                       | 9  | 0   | 0   | 0  | 0  | 0  | 0.0                    | PD           |     |  |
|                   |                  | B                    | 10              | 0               | 0               | 10              | 10                  | 18.3                 | 0.003            | 1.6                     | >4                    | 2.95                  | 0.55 | 14             | 0.006                 | 0  | 3   | 7   | 0  | 0  | 0  | 0                      | 2.0          | PD2 |  |
|                   |                  | C                    | 9               | 0               | 0               | 9               | 9                   | 15.7                 | 0.021            | 1.4                     | >4                    | 3.69                  | 0.69 | 14             | 0.024                 | 0  | 6   | 3   | 0  | 0  | 0  | 0.0                    | PD1          |     |  |
|                   |                  | D                    | 9               | 0               | 0               | 9               | 0                   | .                    | <0.001           | >7.8                    | 0.0                   | 0.06                  | 0.01 | 14             | <0.001                | 0  | 0   | 0   | 0  | 0  | 0  | 9                      | 10.0         | MCR |  |
|                   |                  | E                    | 9               | 0               | 0               | 9               | 0                   | .                    | <0.001           | >7.8                    | 0.0                   | 0.02                  | 0.00 | 14             | <0.001                | 0  | 0   | 0   | 0  | 0  | 0  | 9                      | 10.0         | MCR |  |
|                   |                  | D v E                |                 | 1.000           |                 |                 |                     |                      |                  |                         |                       |                       |      |                |                       |    |     |     |    |    |    |                        |              |     |  |
| B32               | ES-8             | A                    | 10              | 0               | 0               | 10              | 10                  | 5.7                  |                  |                         | >4                    | 5.20                  | .    | .              |                       | 10 | 0   | 0   | 0  | 0  | 0  | 0.0                    | PD           |     |  |
|                   |                  | B                    | 10              | 0               | 0               | 10              | 10                  | 7.1                  | 0.110            | 1.2                     | >4                    | 4.18                  | 0.80 | 7              | 0.063                 | 0  | 8   | 2   | 0  | 0  | 0  | 0.0                    | PD1          |     |  |
|                   |                  | C                    | 10              | 0               | 0               | 10              | 10                  | 10.7                 | <0.001           | 1.9                     | >4                    | 2.23                  | 0.43 | 7              | <0.001                | 0  | 2   | 8   | 0  | 0  | 0  | 2.0                    | PD2          |     |  |
|                   |                  | D                    | 10              | 0               | 0               | 10              | 7                   | 38.7                 | <0.001           | 6.7                     | >4                    | 0.16                  | 0.03 | 7              | <0.001                | 0  | 0   | 0   | 0  | 0  | 7  | 3                      | 8.0          | CR  |  |
|                   |                  | E                    | 10              | 0               | 0               | 10              | 6                   | 33.4                 | <0.001           | 5.8                     | >4                    | 0.15                  | 0.03 | 7              | <0.001                | 0  | 0   | 0   | 0  | 0  | 6  | 4                      | 8.0          | CR  |  |
|                   |                  | D v E                |                 | 0.797           |                 |                 |                     |                      |                  |                         |                       |                       |      |                |                       |    |     |     |    |    |    |                        |              |     |  |
| D1                | GBM2             | A                    | 10              | 0               | 0               | 10              | 10                  | 6.5                  |                  |                         | >4                    | 4.17                  | .    | .              |                       | 10 | 0   | 0   | 0  | 0  | 0  | 0.0                    | PD           |     |  |
|                   |                  | B                    | 10              | 0               | 0               | 10              | 10                  | 35.3                 | <0.001           | 5.4                     | >4                    | 0.87                  | 0.21 | 7              | <0.001                | 0  | 0   | 0   | 0  | 0  | 10 | 0                      | 8.0          | CR  |  |
|                   |                  | C                    | 10              | 0               | 0               | 10              | 10                  | 8.0                  | 0.295            | 1.2                     | >4                    | 3.68                  | 0.88 | 7              | 0.529                 | 0  | 8   | 2   | 0  | 0  | 0  | 0.0                    | PD1          |     |  |
|                   |                  | D                    | 10              | 0               | 0               | 10              | 6                   | 83.2                 | <0.001           | 12.8                    | >4                    | 0.60                  | 0.14 | 7              | <0.001                | 0  | 0   | 0   | 0  | 0  | 6  | 4                      | 8.0          | CR  |  |
|                   |                  | E                    | 10              | 0               | 0               | 10              | 3                   | .                    | <0.001           | >14.0                   | 0.0                   | 0.48                  | 0.12 | 7              | <0.001                | 0  | 0   | 0   | 0  | 0  | 3  | 7                      | 10.0         | MCR |  |
| D v E             |                  | 0.298                |                 |                 |                 |                 |                     |                      |                  |                         |                       |                       |      |                |                       |    |     |     |    |    |    |                        |              |     |  |

<sup>1</sup> A: Control; B, TMZ 30 mg/kg daily x 5; C; talazoparib 0.25 mg/kg BID x 5; D; TMZ 30 mg/kg x 5 + talazoparib 0.1 mg/kg BID x 5 (Combination A); E, TMZ 12 mg/kg x 5 + talazoparib 0.25 mg/kg BID x 5 (Combination B).

<sup>2</sup> N1 – number of mice in group; <sup>4</sup> Nd – number of mice that experienced toxic deaths; <sup>5</sup> No – number of additional mice excluded; <sup>6</sup> Na – number of mice analyzed; <sup>7</sup> Number of events. An event was defined as a quadrupling of tumor volume from the initial volume for solid tumor cell lines and reaching  $\geq 25\%$  hCD45 cells for ALL cell lines; <sup>8</sup> Kaplan-Meier estimate of median days to event. Time to event was estimated using interpolation; <sup>9</sup> For solid tumor cell lines, this column is the median relative tumor volume at the end of the study; for ALL cell lines, this is the median hCD45% at the end of the study; <sup>10</sup> For solid tumor cell lines, this column is the average relative tumor volume at the day T/C

was assessed (day 21 or before); <sup>11</sup> P-value testing the relative tumor volumes between treatment and control groups at the day T/C was assessed (day 21 or before) (the exact Wilcoxon rank-sum test was used). Note: Studies where the EFS was significantly (or marginally) different between control and treatment groups ( $p < 0.10$ ) and where the median EFS in the control group was longer than the median EFS in the treatment group are highlighted in yellow.

**Supplemental Table III. Efficacy of Combination B against PPTP Xenograft Models**

| Study Information |                  |                | Animal Counts/Status |                 |                 |                 |                     | EFS Evaluation       |                  |         | Tumor Volume Evaluation |                        |      |                |                       | Response Evaluation |     |     |    |    |    |     | Overall Group Response |     |
|-------------------|------------------|----------------|----------------------|-----------------|-----------------|-----------------|---------------------|----------------------|------------------|---------|-------------------------|------------------------|------|----------------|-----------------------|---------------------|-----|-----|----|----|----|-----|------------------------|-----|
| Cell Line         | Line Description | Group          | N1 <sup>3</sup>      | Nd <sup>4</sup> | No <sup>5</sup> | Na <sup>6</sup> | No. ev <sup>7</sup> | KM med. <sup>8</sup> | Log-Rank P-value | EFS T/C | Med. RTV <sup>9</sup>   | Avg. RTV <sup>10</sup> | T/C  | T/C Time (Day) | Wilc. P <sup>11</sup> | PD                  | PD1 | PD2 | SD | PR | CR | MCR | Median Score           |     |
| D1                | GBM2             | A <sup>1</sup> | 10                   | 0               | 0               | 10              | 10                  | 11.2                 |                  |         | >4                      | 2.73                   | .    | 7              |                       | 10                  | 0   | 0   | 0  | 0  | 0  | 0   | 0.0                    | PD  |
|                   |                  | B <sup>2</sup> | 10                   | 5               | 0               | 5               | 0                   | .                    | <0.001           | > 3.7   | 0.0                     | 0.00                   | 0.00 | 7              | <0.001                | 0                   | 0   | 0   | 0  | 0  | 0  | 5   | 10.0                   | MCR |
| D2                | BT-39            | A              | 10                   | 0               | 0               | 10              | 10                  | 5.4                  |                  |         | >4                      | 6.00                   | .    | 7              |                       | 10                  | 0   | 0   | 0  | 0  | 0  | 0   | 0.0                    | PD  |
|                   |                  | B              | 10                   | 4               | 0               | 6               | 6                   | 12.4                 | <0.001           | 2.3     | >4                      | 3.29                   | 0.55 | 7              | <0.001                | 0                   | 1   | 5   | 0  | 0  | 0  | 0   | 2.0                    | PD2 |
| D3                | D645             | A              | 10                   | 0               | 0               | 10              | 10                  | 8.7                  |                  |         | >4                      | 3.35                   | .    | 7              |                       | 10                  | 0   | 0   | 0  | 0  | 0  | 0   | 0.0                    | PD  |
|                   |                  | B              | 10                   | 2               | 0               | 8               | 0                   | .                    | <0.001           | > 4.8   | 0.0                     | 0.40                   | 0.12 | 7              | <0.001                | 0                   | 0   | 0   | 0  | 0  | 0  | 8   | 10.0                   | MCR |
| E1                | NB-SD            | A              | 10                   | 0               | 0               | 10              | 10                  | 6.5                  |                  |         | >4                      | 4.35                   | .    | 7              |                       | 10                  | 0   | 0   | 0  | 0  | 0  | 0   | 0.0                    | PD  |
|                   |                  | B              | 10                   | 0               | 1               | 9               | 8                   | 38.6                 | <0.001           | 5.9     | >4                      | 2.47                   | 0.57 | 7              | <0.001                | 0                   | 0   | 9   | 0  | 0  | 0  | 0   | 2.0                    | PD2 |
| E3                | NB-1691          | A              | 10                   | 0               | 0               | 10              | 10                  | 5.5                  |                  |         | >4                      | 5.76                   | .    | 7              |                       | 10                  | 0   | 0   | 0  | 0  | 0  | 0   | 0.0                    | PD  |
|                   |                  | B              | 10                   | 0               | 0               | 10              | 10                  | 15.1                 | <0.001           | 2.8     | >4                      | 1.43                   | 0.25 | 7              | <0.001                | 0                   | 0   | 10  | 0  | 0  | 0  | 0   | 2.0                    | PD2 |
| E4                | NB-EBc1          | A              | 10                   | 0               | 0               | 10              | 10                  | 4.0                  |                  |         | >4                      | 11.29                  | .    | 7              |                       | 10                  | 0   | 0   | 0  | 0  | 0  | 0   | 0.0                    | PD  |
|                   |                  | B              | 10                   | 0               | 0               | 10              | 10                  | 10.7                 | <0.001           | 2.7     | >4                      | 2.07                   | 0.18 | 7              | <0.001                | 0                   | 0   | 10  | 0  | 0  | 0  | 0   | 2.0                    | PD2 |
| E5                | CHLA-79          | A              | 8                    | 0               | 0               | 8               | 8                   | 6.2                  |                  |         | >4                      | 4.64                   | .    | 7              |                       | 8                   | 0   | 0   | 0  | 0  | 0  | 0   | 0.0                    | PD  |
|                   |                  | B              | 10                   | 0               | 0               | 10              | 9                   | 32.1                 | <0.001           | 5.2     | >4                      | 0.75                   | 0.16 | 7              | <0.001                | 0                   | 0   | 2   | 0  | 1  | 7  | 0   | 8.0                    | CR  |
| E6                | NB-1643          | A              | 10                   | 0               | 0               | 10              | 10                  | 6.2                  |                  |         | >4                      | 5.04                   | .    | 7              |                       | 10                  | 0   | 0   | 0  | 0  | 0  | 0   | 0.0                    | PD  |
|                   |                  | B              | 10                   | 0               | 0               | 10              | 10                  | 19.7                 | <0.001           | 3.2     | >4                      | 1.48                   | 0.29 | 7              | <0.001                | 0                   | 0   | 9   | 0  | 1  | 0  | 0   | 2.0                    | PD2 |
| F1                | OS-1             | A              | 10                   | 0               | 0               | 10              | 10                  | 22.5                 |                  |         | >4                      | 3.68                   | .    | 21             |                       | 10                  | 0   | 0   | 0  | 0  | 0  | 0   | 0.0                    | PD  |
|                   |                  | B              | 10                   | 1               | 0               | 9               | 9                   | 33.1                 | <0.001           | 1.5     | >4                      | 2.34                   | 0.64 | 21             | <0.001                | 0                   | 5   | 4   | 0  | 0  | 0  | 0   | 0.0                    | PD1 |
| F2                | OS-2             | A              | 10                   | 0               | 0               | 10              | 10                  | 24.7                 |                  |         | >4                      | 2.91                   | .    | 21             |                       | 10                  | 0   | 0   | 0  | 0  | 0  | 0   | 0.0                    | PD  |
|                   |                  | B              | 10                   | 2               | 0               | 8               | 0                   | .                    | <0.001           | > 1.7   | 2.7                     | 1.22                   | 0.42 | 21             | <0.001                | 0                   | 0   | 8   | 0  | 0  | 0  | 0   | 2.0                    | PD2 |
| F3                | OS-17            | A              | 10                   | 0               | 0               | 10              | 10                  | 20.1                 |                  |         | >4                      | 4.21                   | .    | 21             |                       | 10                  | 0   | 0   | 0  | 0  | 0  | 0   | 0.0                    | PD  |
|                   |                  | B              | 10                   | 0               | 0               | 10              | 10                  | 29.7                 | <0.001           | 1.5     | >4                      | 2.63                   | 0.63 | 21             | <0.001                | 0                   | 6   | 4   | 0  | 0  | 0  | 0   | 0.0                    | PD1 |
| F11               | OS-31            | A              | 10                   | 0               | 0               | 10              | 10                  | 21.6                 |                  |         | >4                      | 3.75                   | .    | 21             |                       | 10                  | 0   | 0   | 0  | 0  | 0  | 0   | 0.0                    | PD  |
|                   |                  | B              | 10                   | 2               | 0               | 8               | 5                   | 38.5                 | <0.001           | 1.8     | >4                      | 1.47                   | 0.39 | 21             | <0.001                | 0                   | 0   | 8   | 0  | 0  | 0  | 0   | 2.0                    | PD2 |
| G1                | ALL-2            | A              | 9                    | 0               | 0               | 9               | 9                   | 8.3                  |                  |         | >25                     | .                      | .    | .              |                       | 9                   | 0   | 0   | 0  | 0  | 0  | 0   | 0.0                    | PD  |
|                   |                  | B              | 9                    | 1               | 0               | 8               | 8                   | 17.7                 | 0.050            | 2.1     | >25                     | .                      | .    | .              |                       | 0                   | 3   | 5   | 0  | 0  | 0  | 0   | 2.0                    | PD2 |
| G3                | ALL-4            | A              | 9                    | 0               | 1               | 8               | 8                   | 6.0                  |                  |         | >25                     | .                      | .    | .              |                       | 8                   | 0   | 0   | 0  | 0  | 0  | 0   | 0.0                    | PD  |
|                   |                  | B              | 9                    | 4               | 0               | 5               | 5                   | 12.0                 | 0.009            | 2.0     | >25                     | .                      | .    | .              |                       | 0                   | 0   | 4   | 0  | 1  | 0  | 0   | 2.0                    | PD2 |
| G4                | ALL-7            | A              | 9                    | 0               | 0               | 9               | 9                   | 6.0                  |                  |         | >25                     | .                      | .    | .              |                       | 9                   | 0   | 0   | 0  | 0  | 0  | 0   | 0.0                    | PD  |
|                   |                  | B              | 9                    | 5               | 0               | 4               | 4                   | 11.8                 | 0.001            | 2.0     | >25                     | .                      | .    | .              |                       | 0                   | 0   | 4   | 0  | 0  | 0  | 0   | 2.0                    | PD2 |
| G5                | ALL-8            | A              | 9                    | 0               | 0               | 9               | 9                   | 6.0                  |                  |         | >25                     | .                      | .    | .              |                       | 9                   | 0   | 0   | 0  | 0  | 0  | 0   | 0.0                    | PD  |
|                   |                  | B              | 9                    | 4               | 0               | 5               | 5                   | 22.0                 | <0.001           | 3.7     | >25                     | .                      | .    | .              |                       | 0                   | 0   | 4   | 0  | 1  | 0  | 0   | 2.0                    | PD2 |
| G7                | ALL-17           | A              | 9                    | 0               | 0               | 9               | 8                   | 6.2                  |                  |         | >25                     | .                      | .    | .              |                       | 8                   | 0   | 0   | 0  | 1  | 0  | 0   | 0.0                    | PD  |
|                   |                  | B              | 9                    | 7               | 0               | 2               | 2                   | 21.7                 | 0.182            | 3.5     | >25                     | .                      | .    | .              |                       | 0                   | 0   | 2   | 0  | 0  | 0  | 0   | 2.0                    | PD2 |

| Study Information |                  | Animal Counts/Status |                 |                 |                 |                 |                     | EFS Evaluation       |                  | Tumor Volume Evaluation |                       |                        |            |                       | Response Evaluation |     |     |    |    |    | Overall Group Response |              |     |
|-------------------|------------------|----------------------|-----------------|-----------------|-----------------|-----------------|---------------------|----------------------|------------------|-------------------------|-----------------------|------------------------|------------|-----------------------|---------------------|-----|-----|----|----|----|------------------------|--------------|-----|
| Cell Line         | Line Description | Group                | N1 <sup>3</sup> | Nd <sup>4</sup> | No <sup>5</sup> | Na <sup>6</sup> | No. ev <sup>7</sup> | KM med. <sup>8</sup> | Log-Rank P-value | EFS T/C                 | Med. RTV <sup>9</sup> | Avg. RTV <sup>10</sup> | T/C (Day ) | Wilc. P <sup>11</sup> | PD                  | PD1 | PD2 | SD | PR | CR | MCR                    | Median Score |     |
| G8                | ALL-19           | A                    | 9               | 0               | 0               | 9               | 8                   | 4.1                  |                  |                         | >25                   | .                      | .          | .                     | 8                   | 0   | 0   | 0  | 1  | 0  | 0                      | 0.0          | PD  |
|                   |                  | B                    | 9               | 5               | 0               | 4               | 4                   | 11.9                 | 0.540            | 2.9                     | >25                   | .                      | .          | .                     | 0                   | 0   | 4   | 0  | 0  | 0  | 0                      | 2.0          | PD2 |
| G14               | ALL-31           | A                    | 9               | 0               | 0               | 9               | 9                   | 10.0                 |                  |                         | >25                   | .                      | .          | .                     | 9                   | 0   | 0   | 0  | 0  | 0  | 0                      | 0.0          | PD  |
|                   |                  | B                    | 9               | 4               | 0               | 5               | 5                   | 9.1                  | 0.390            | 0.9                     | >25                   | .                      | .          | .                     | 0                   | 3   | 2   | 0  | 0  | 0  | 0                      | 0.0          | PD1 |
| G15               | MLL-7            | A                    | 9               | 0               | 0               | 9               | 8                   | 9.1                  |                  |                         | >25                   | .                      | .          | .                     | 8                   | 0   | 0   | 1  | 0  | 0  | 0                      | 0.0          | PD  |
|                   |                  | B                    | 9               | 6               | 0               | 3               | 3                   | 26.5                 | 0.327            | 2.9                     | >25                   | .                      | .          | .                     | 0                   | 0   | 0   | 0  | 2  | 1  | 0                      | 6.0          | PR  |

<sup>1</sup> A: Control; <sup>2</sup> B: Treated (temozolomide 12 mg/kg Dx5, talazoparib 0.25 mg/kg BID x5); <sup>3</sup> N1 – number of mice in group; <sup>4</sup> Nd – number of mice that experienced toxic deaths; <sup>5</sup> No – number of additional mice excluded; <sup>6</sup> Na – number of mice analyzed; <sup>7</sup> Number of events. An event was defined as a quadrupling of tumor volume from the initial volume for solid tumor cell lines and reaching  $\geq 25\%$  hCD45 cells for ALL cell lines; <sup>8</sup> Kaplan-Meier estimate of median days to event. Time to event was estimated using interpolation; <sup>9</sup> For solid tumor cell lines, this column is the median relative tumor volume at the end of the study; for ALL cell lines, this is the median hCD45% at the end of the study; <sup>10</sup> For solid tumor cell lines, this column is the average relative tumor volume at the day T/C was assessed (day 21 or before); <sup>11</sup> P-value testing the relative tumor volumes between treatment and control groups at the day T/C was assessed (day 21 or before) (the exact Wilcoxon rank-sum test was used).



**Supplemental Table IV: Therapeutic Enhancement in vivo.**

| Cell Line | Xenograft | TMZ <sup>1</sup> (group B)<br>T-C | TAL <sup>2</sup> (group C)<br>T-C | Combo A (group D)<br>T-C | P-value<br>[combination D<br>vs. 0904] | P-value<br>[combination<br>D vs. 1206] | Therapeutic<br>Enhancement |
|-----------|-----------|-----------------------------------|-----------------------------------|--------------------------|----------------------------------------|----------------------------------------|----------------------------|
| A2        | KT-10     | 4.17                              | >73.41                            | >73.41                   | 0.000011                               | 0.032508                               | NO                         |
| A6        | SK-NEP-1  | -1.61                             | -0.43                             | 21.79                    | 0.000041                               | 0.000041                               | YES                        |
| B2        | EW5       | 1.11                              | 0.10                              | 19.85                    | 0.000011                               | 0.000011                               | YES                        |
| B3        | EW8       | 2.35                              | 6.64                              | 8.93                     | 0.000065                               | 0.659843                               | NO                         |
| B11       | TC-71     | 0.31                              | 1.84                              | >80.62                   | 0.000011                               | 0.000011                               | YES                        |
| B12       | CHLA258   | 0.68                              | 2.37                              | >81.52                   | 0.000011                               | 0.000011                               | YES                        |
| B15       | ES6       | 6.00                              | 1.46                              | 16.79                    | 0.008833                               | 0.000011                               | YES                        |
| B6        | Rh28      | >61.02                            | -16.29                            | >61.02                   | 0.210526                               | 0.000011                               | NO                         |
| B7        | Rh30      | 1.38                              | -0.42                             | 34.60                    | 0.000011                               | 0.000011                               | YES                        |
| B8        | Rh41      | -0.95                             | -1.69                             | -1.45                    | 0.62267                                | 0.769664                               | NO                         |
| B16       | ES4       | 4.41                              | 2.88                              | 70.07                    | 0.000011                               | 0.000011                               | YES                        |
| B29       | ES2       | 0.85                              | 2.16                              | 7.40                     | 0.001331                               | 0.002219                               | YES                        |
| B30       | ES3       | 1.46                              | 1.83                              | 17.10                    | 0.000011                               | 0.000011                               | YES                        |
| B31       | ES7       | 6.74                              | 4.10                              | >79.40                   | 0.000011                               | 0.000041                               | YES                        |
| B32       | ES8       | 1.33                              | 4.93                              | 32.99                    | 0.000011                               | 0.000011                               | YES                        |
| D1        | GBM2      | 28.82                             | 1.54                              | 76.72                    | 0.000011                               | 0.000011                               | YES                        |
|           |           | TMZ(group B)<br>T-C               | TAL (group C)<br>T-C              | Combo B (group E)<br>T-C | P-value<br>[combination E<br>vs. 0904] | P-value<br>[combination<br>E vs. 1206] | Therapeutic<br>Enhancement |
| A2        | KT-10     | 4.17                              | >73.41                            | >73.41                   | 0.000011                               | 0.032508                               | NO                         |
| A6        | SK-NEP-1  | -1.61                             | -0.43                             | >80.46                   | 0.000011                               | 0.000011                               | YES                        |
| B2        | EW5       | 1.11                              | 0.10                              | 15.17                    | 0.000011                               | 0.000011                               | YES                        |
| B3        | EW8       | 2.35                              | 6.64                              | 5.80                     | 0.006495                               | 0.335729                               | NO                         |
| B11       | TC-71     | 0.31                              | 1.84                              | >80.62                   | 0.000011                               | 0.000011                               | YES                        |
| B12       | CHLA258   | 0.68                              | 2.37                              | >81.52                   | 0.000011                               | 0.000011                               | YES                        |
| B15       | ES6       | 6.00                              | 1.46                              | 12.44                    | 0.116207                               | 0.000022                               | NO                         |
| B6        | Rh28      | >61.02                            | -16.29                            | >61.02                   | 0.210526                               | 0.000011                               | NO                         |
| B7        | Rh30      | 1.38                              | -0.42                             | 21.88                    | 0.000011                               | 0.000011                               | YES                        |
| B8        | Rh41      | -0.95                             | -1.69                             | 1.09                     | 0.006971                               | 0.003204                               | YES                        |
| B16       | ES4       | 4.41                              | 2.88                              | 65.92                    | 0.000011                               | 0.000011                               | YES                        |
| B29       | ES2       | 0.85                              | 2.16                              | 18.44                    | 0.000054                               | 0.000054                               | YES                        |
| B30       | ES3       | 1.46                              | 1.83                              | 9.43                     | 0.000011                               | 0.000011                               | YES                        |
| B31       | ES7       | 6.74                              | 4.10                              | >79.40                   | 0.000011                               | 0.000041                               | YES                        |
| B32       | ES8       | 1.33                              | 4.93                              | 27.69                    | 0.000011                               | 0.000011                               | YES                        |
| D1        | GBM2      | 28.82                             | 1.54                              | >84.50                   | 0.000022                               | 0.000011                               | YES                        |

<sup>1</sup> TMZ, temozolomide; <sup>2</sup> TAL, talazoparib.

**Supplemental Table V. Responses to Tumor Models to Combination B (talazoparib plus low-dose temozolomide)**

| Line     | Tumor Type      | Median Time to Event | P-value <sup>2</sup> | EFS T/C <sup>3</sup> | Median RTV/CD45 at End of Study <sup>4</sup> | Group Response <sup>5</sup> |
|----------|-----------------|----------------------|----------------------|----------------------|----------------------------------------------|-----------------------------|
| D645*    | Glioblastoma    | > EP                 | <0.001               | > 4.8                | 0.0                                          | <b>MCR</b>                  |
| NB-SD    | Neuroblastoma   | 38.6                 | <0.001               | 5.9                  | >4                                           | PD2                         |
| NB-1691  | Neuroblastoma   | 15.1                 | <0.001               | 2.8                  | >4                                           | PD2                         |
| NB-EBc1  | Neuroblastoma   | 10.7                 | <0.001               | 2.7                  | >4                                           | PD2                         |
| CHLA-79* | Neuroblastoma   | 32.1                 | <0.001               | 5.2                  | >4                                           | <b>CR</b>                   |
| NB-1643* | Neuroblastoma   | 19.7                 | <0.001               | 3.2                  | >4                                           | PD2                         |
| OS-1     | Osteosarcoma    | 33.1                 | <0.001               | 1.5                  | >4                                           | PD1                         |
| OS-2     | Osteosarcoma    | > EP                 | <0.001               | > 1.7                | 2.7                                          | PD2                         |
| OS-17    | Osteosarcoma    | 29.7                 | <0.001               | 1.5                  | >4                                           | PD1                         |
| OS-31    | Osteosarcoma    | 38.5                 | <0.001               | 1.8                  | >4                                           | PD2                         |
| ALL-2    | ALL B-precursor | 17.7                 | 0.050                | 2.1                  | >25                                          | PD2                         |

<sup>1</sup> Temozolomide 12 mg/kg x 5 + talazoparib 0.25 mg/kg BID x 5

<sup>2</sup> P-value comparing EFS distribution of treated and control groups.

<sup>3</sup> EFS T/C: ratio of event-free survival (median time to event) for treated and control groups

<sup>4</sup> RTV: ratio of median relative tumor volume at end of observation period for treated to control groups

<sup>5</sup> See Materials and Methods section for definitions of Progressive Disease 1 (PD1), Progressive Disease 2 (PD2), Stable Disease (SD), Partial Response (PR), Complete Response (CR), and Maintained Complete Response (MCR)

\*Low MGMT-expressing xenograft lines.

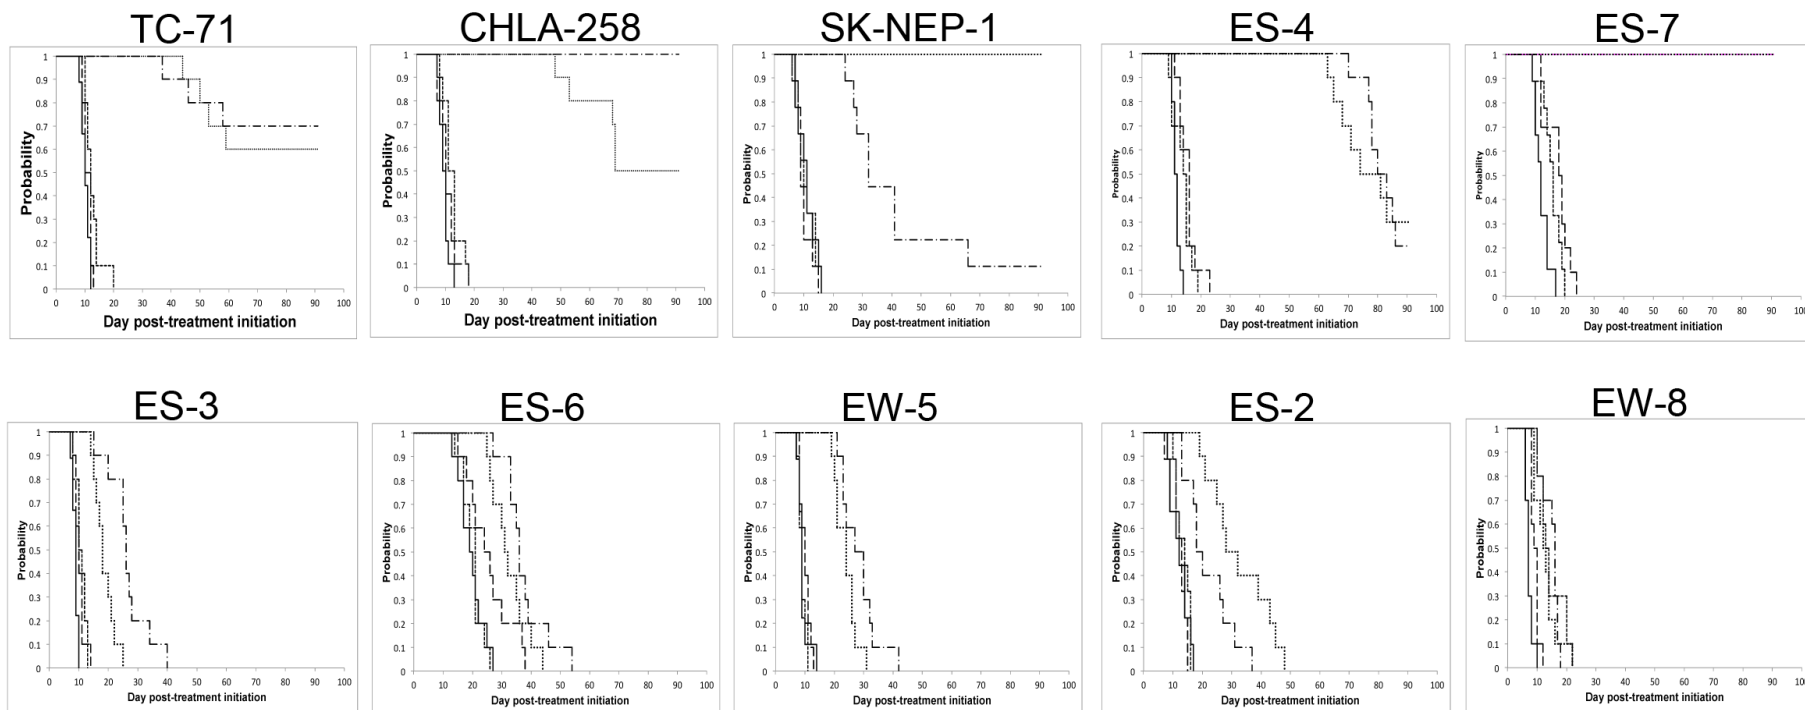

Supplemental Figure 1. Kaplan-Meier estimates for Event-Free Survival in Ewing sarcoma xenograft models.

### Treatment Group

A  
  B  
  C  
  D  
  E

- A: Control;
- B, TMZ 30 mg/kg daily x 5;
- C; talazoparib 0.25 mg/kg BID x 5;
- D; TMZ 30 mg/kg x 5 + talazoparib 0.1 mg/kg BID x 5 (Combination A);
- E, TMZ 12 mg/kg x 5 + talazoparib 0.25 mg/kg BID x 5 (Combination B).

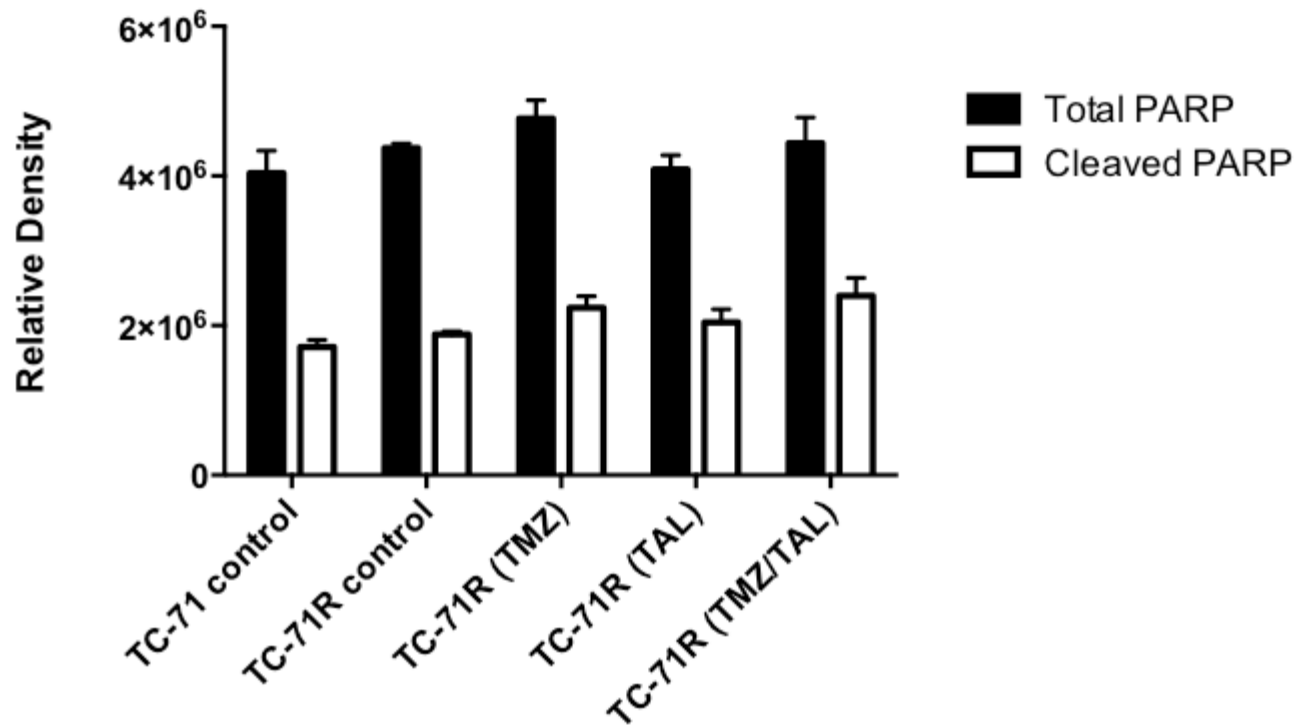

Supplemental Figure 2. Quantification of total (cleaved + uncleaved) PARP, and cleaved PARP following 5 days treatment of TC-71R tumors with talazoparib, temozolomide or the combination, from Figure 4F. Relative levels of total and cleaved PARP are shown for parental TC-71 xenografts.
